## **Defoliation-induced compensatory transpiration is compromised in *SUT4*-RNAi *Populus***

Scott A. Harding\*, Christopher J. Frost<sup>1</sup>, and Chung-Jui Tsai

Warnell School of Forestry and Natural Resources, Department of Genetics and Department of Plant Biology, University of Georgia, Athens, Georgia 30602, USA

\* Corresponding author: Scott Harding ([sharding@uga.edu](mailto:sharding@uga.edu))

<sup>1</sup> Present address: Department of Biology, University of Louisville, Louisville, KY 40292, USA.

ORCID IDs: 0000-0001-5098-2370 (SAH); 0000-0001-5986-8646 (CJF); 0000-0002-9282-7704 (CJT)

## Abstract

Leaf sucrose contents are high in species of the genus *Populus* and other temperate tree taxa. Sucrose is subcellularly compartmentalized, but assumptions about the physiological relevance of such partitioning remain largely unexplored. In this study, the effects of partial defoliation treatments on water uptake, leaf gas exchange properties, non-structural carbohydrate abundance in source and sink organs, and growth were compared in poplars with normal or impaired intracellular sucrose trafficking. The tonoplast sucrose transporter PtaSUT4 is well expressed in leaves of *P. tremula* × *P. alba* (INRA 717-IB4), and its inhibition by RNA-interference (RNAi) is known to affect leaf sucrose abundance. After partial defoliation, maximum photosynthesis rates increased while intercellular CO<sub>2</sub> decreased with trajectories that were similar in wild type and *SUT4*-RNAi lines. Leaf transpiration increased more robustly in wild-type than RNAi plants, while leaf water content increased more in RNAi lines. Stomatal conductance did not differ between genotypes, nor did it increase with defoliation. Post-defoliation reductions in steady-state levels of sucrose, the major hexoses (glucose and fructose) and starch were similar in wild-type and *SUT4*-RNAi shoot sinks. Water uptake and stem growth after partial defoliation were not as well sustained in RNAi as in wild-type plants. The data suggest that vacuolar efflux of sucrose by PtaSUT4 more clearly facilitated adjustments in water uptake than sucrose export following leaf removal.

**Keywords:** water uptake, subcellular sucrose partitioning, relative water content, defoliation

## Introduction

2

Sucrose and its hexose breakdown products contribute significantly to the high leaf osmolalities often found in temperate tree species like *Populus* (Rennie and Turgeon 2009; Slewinski et al. 2013). High osmolality is thought to enable turgor maintenance under conditions of low plant hydraulic conductivity while obviating a need for energy-dependent active phloem loading of sucrose in these species that depend on passive diffusion of sucrose for long distance transport (Davidson et al. 2011; Fu et al. 2011). Mesophyll sucrose resides in both the vacuole and the cytosol but little is known about how sucrose trafficking across the tonoplast might impact osmotic regulation. In addition to leaf turgor maintenance, there is the question of how sucrose partitioning might impact sink carbohydrate provisioning. Tonoplast trafficking of sucrose has long been considered important for the maintenance of cytosolic sucrose at high enough concentrations to support passive diffusion into the phloem (Turgeon and Medville 1998). This would presumably mean that sucrose accumulating during the day and stored in the vacuole would be released at night in order to sustain high cytosolic levels and diffusion to the phloem for sink provisioning. Interestingly, it is starch rather than sucrose levels that become depleted at night in *Populus* (Zhang et al. 2014). From these observations, it is unclear whether tonoplast sucrose trafficking in *Populus* is as important for export to sinks as it may be for plant hydrodynamics such as transpiration.

20

Sucrose compartmentalization involves its uptake into the vacuole by the tonoplast monosaccharide proton antiporter and its efflux into the cytosol by the tonoplast sucrose proton symporter SUT4 (Reinders et al. 2008; Schulz et al. 2011; Schneider et al. 2012). In *Arabidopsis* where phloem loading is active and mediated exclusively by plasma membrane SUTs (Ayre 2011; Liesche 2017), *AtSUT4* is very weakly expressed, representing less than 5% of leaf *SUT* transcript abundance (Lloyd and Zakhleniuk 2004; Schneider et al. 2012). In the monocot sorghum, the tonoplast SUT4 is as well expressed as plasma membrane SUTs in source leaves and thought to facilitate active phloem loading (Milne et al. 2013). Leaf sucrose exporting ability and plant growth are impaired in rice mutants defective in the SUT4 ortholog

30 *OsSUT2*, which led to the conclusion that passive transport is important in rice and that *OsSUT2*  
drives sucrose export to the sink organs (Eom et al. 2011; Eom et al. 2012). In the poplar hybrid  
32 *P. tremula* × *P. alba* INRA 717-1B4 where sucrose is not actively loaded into the phloem (Fu et  
al. 2011; Zhang et al. 2014), *PtaSUT4* is the most highly expressed SUT in leaves (Payyavula et  
34 al. 2011). RNAi inhibition of *PtaSUT4* led to elevated leaf sucrose levels consistent with vacuolar  
sequestration, but unlike the case for the *ossut2* mutant of rice, plant growth was not impaired  
36 (Payyavula et al. 2011). Besides the possible role in sucrose export to sinks, the potential for  
SUT4 to modulate transpiration has not been explored.

38  
*AtSUT4* expression is more readily detected in roots than shoots, and evidence for osmotic  
40 responsiveness of the *AtSUT4* promoter independent of sucrose has been described (Schneider  
et al. 2012). Increased sucrose levels in *Arabidopsis* roots following osmotic stress or ABA  
42 treatment have been attributed to shoot *AtSUT4* in conjunction with plasma membrane  
phloem-loading SUTs (Gong et al. 2015). However, substantial stress-induced root sucrose  
44 increases were also noted in null mutants of those transporters (Gong et al. 2015). When  
*Arabidopsis* plants were grown from seed under mild water deficit conditions, sugar levels  
46 increased in shoots and roots, but *AtSUT4* was not among the *SUTs* that exhibited transcript  
level increases (Durand et al. 2016). This contrasts with large *PtaSUT4* expression decreases  
48 that occur in poplar plants grown under chronic, mild water deficit conditions (Frost et al.  
2012). Consistent with the notion of functional versatility in *Populus*, *PtaSUT4* expression has  
50 been found to respond differently to chronic and acute water stress (Frost et al. 2012; Xue et al.  
2016; Pagliarani et al. 2019). In addition, aquaporin expression differs between drought-  
52 stressed wild-type (WT) and *SUT4*-RNAi poplars, consistent with a link between sucrose  
trafficking and changes in water flux (Xue et al. 2016). Together, it appears that the  
54 physiological role of *SUT4* includes export of sucrose to distant sinks for their nourishment,  
modulation of hydraulic properties that affect transpiration, or a delicate balancing of both.

56  
As large, long-lived perennials, broadleaf tree species constantly undergo changes in  
58 source:sink ratio which, like stresses, trigger compensatory changes in photosynthesis, water

uptake and carbohydrate utilization as plants adjust (Turnbull et al. 2007; Wiley et al. 2013).  
60 Growth reductions and mortality can follow repeated defoliations, but photosynthesis and  
transpiration can increase on a leaf area or per tree basis following partial defoliation or stand  
62 thinning (Breda et al. 1995; Eyles et al. 2013). In several studies, the transpiration increases  
were accompanied by more negative leaf water potentials and stable leaf hydraulic  
64 conductivity although the relationships vary across species and with stress severity (Brodribb  
and Holbrook 2006; Eyles et al. 2013; Liu et al. 2014). Diurnal adjustments in leaf water  
66 potential and hydraulic conductivity as transpiration oscillates, even under well-watered  
conditions have also been reported (Simonin et al. 2015). Variation among poplar genotypes  
68 with respect to leaf water potential adjustments and growth under stress conditions has been  
described, and probably depends on multiple underlying controls (Tschaplinski et al. 2006). The  
70 present work utilized pot-grown WT and *SUT4*-RNAi saplings to assess whether *SUT4*-mediated  
sucrose efflux from the vacuole potentially contributes to compensatory mechanisms deployed  
72 in tree leaves following defoliation.

74

## Materials and Methods

76

### Plant propagation and growth

78 Generation and characterization of the *SUT4*-RNAi lines in the hybrid poplar *P. tremula* × *P. alba*  
INRA 717-1B4 background (717) were previously described (Payyavula et al. 2011; Xue et al.  
80 2016). Single-node cuttings were grown in a glasshouse in 4 gallon tree pots (Hummert  
International) containing commercial soil mixture (Fafard 3B) supplemented with Osmocote  
82 (15-9-12 NPK 4-month release) as previously described (Frost et al. 2012; Xue et al. 2016). Two  
experiments were conducted, the first, an 8-day experiment during May and June 2012; the  
84 second, a 16-day experiment during May and June 2016. The second experiment was  
necessitated because samples from the first experiment became degraded due to freezer  
86 malfunction before starch, condensed tannin and phenolic glycosides were measured. Outdoor  
conditions were essentially identical for both experiments. In both cases, evaporative cooling

88 pads kept daytime temperatures below 35°C at canopy height. Plants were watered daily  
throughout the growth and treatment phases of the experiments.

90

### **First defoliation experiment**

92 For the first experiment, sixteen vegetatively propagated copies of WT and two RNAi lines (F  
and G) of roughly uniform height (~1.5 m) were randomly assigned to three defoliation  
94 treatments and a control treatment with no defoliation (N=4 plants per genotype x treatment  
combination). At the time of defoliation, upper stems were marked at the position of leaf  
96 plastochron index zero (LPI-0) according to established developmental index criteria for *Populus*  
(Larson and Isebrands 1971). For the 25% and 50% partial defoliation treatments, respectively,  
98 every fourth or every other leaf and its associated bud scale below LPI-0 was removed. For the  
100% defoliation treatment, all leaves below LPI-0 were removed. Experimental plants were  
100 maintained with normal watering for 8 days at which time photosynthetic parameters were  
measured and tissue harvesting was carried out as detailed below.

102

### **Photosynthesis**

104 Leaf photosynthesis, stomatal conductance and transpiration of WT and *SUT4*-RNAi transgenic  
plants were determined at midday and early afternoon using a Licor LI-6400XS (LiCor, Lincoln,  
106 NE) as described previously (Frost et al. 2012). LPI-6, a newly expanded source leaf, was used  
for the measurements. Photosynthesis, stomatal conductance and transpiration rates were  
108 determined at a single, saturating light intensity of 1500  $\mu\text{mol}/\text{m}^2/\text{s}$ .

### **Biomass analysis and tissue sampling**

Each plant comprised a single unbranched stem. No syleptic bud release along the stem  
112 occurred during the treatment phase. Immediately prior to harvest, a fully expanded source  
leaf at LPI-10 was weighed and snap frozen in liquid nitrogen for metabolite analysis. A stem  
114 section between LPI-15 and 20 was debarked after weighing, and both bark and wood fractions  
snap frozen for metabolite analysis. Upon harvest, fresh weights of the remaining leaves and

116 stems were obtained. Tissues were then placed in a forced-air oven and dried at 100°C for 48  
hr for dry weight determinations.

118

### **Sucrose and hexose analysis**

120 Snap-frozen leaves were lyophilized for 48 hr (FreeZone 2.5, Labconco), then ground through a  
40 mesh sieve using a Wiley Mill (Thomas Scientific). Aliquots of the coarse powder were  
122 further ball-milled in a Mini Bead-beater (Biospec 3110Bx) at intensity setting 25 for two cycles.  
Ten mg of the lyophilized powder was suspended in a microtube with 500 µl  
124 methanol:chloroform (1:1, v/v) containing adonitol as internal standard, and sonicated for 15  
min in a sonic bath with pre-chilled water (4°C). Deionized water (200 µl) was then added to  
126 the tubes and samples vortexed and re-sonicated for 5 min. After centrifugation, 10 µl of the  
upper aqueous-methanol phase was evaporated to dryness in 200 µl glass microserts, and  
128 derivitized for Gas Chromatography-Mass Spectrometry (GC-MS) as described (Jeong et al.  
2004). Briefly, the dried extract was methoximated in 15 µl methoxyamine  
130 hydrochloride/pyridine solution (20 mg/ml; Sigma-Aldrich) for 30 min at 30°C, then silyated for  
90 min at 60°C after adding 30 µl N-Methyl-N-(trimethylsilyl) trifluoroacetamide (Sigma-  
132 Aldrich). Incubations were carried out in a Vortemp 56 orbital shaker (Labnet) at 600 rpm.  
Derivitized samples were injected (1 µl) in 25:1 split mode at an inlet temperature of 250°C.  
134 Metabolites were resolved on a DB-5MS column (30 m length, 0.25 mm diameter with  
DuraGuard pre-column) with a helium flow of 1 ml/min. GC (Agilent 7890A) oven temperature  
136 at injection was 80°C. Following a 1 min hold at 80°C, temperature was ramped 20°C/min to  
200°C, then 10°C/min to 320°C with a 6.5 min hold at 320°C. Metabolites were detected using  
138 an Agilent 5975C MS with source and quadrupole mass filter temperature setting of 230°C and  
150°C, respectively. Mass spectra were collected in scanning ion mode ( $m/z$  50 and 500) in  
140 ChemStation (Agilent) and deconvoluted using AnalyzerPro (SpectralWorks). Peak retention  
times and spectral matches corresponding to fructose, glucose and sucrose were determined  
142 using authentic standards. Peaks areas were integrated using AnalyzerPro.

144 **Second defoliation experiment**

The second experiment was conducted mainly to collect tissues for metabolite assays (starch, condensed tannins and salicinoid phenolic glycosides) that were not carried out for the first experiment due to sample deterioration during long-term storage. In addition, conducting the second experiment presented an opportunity to extend the defoliation treatment for further assessment of defoliation effects on growth. Only a 50% defoliation treatment was utilized, and the duration of the second experiment was increased to 16 days. Starch, condensed tannin and phenolic glycoside levels were measured in order to compare RNAi effects on growth with those on non-structural metabolic sinks. Plants were propagated and grown as before and were approximately the same size at the start of treatment as in the first experiment. Tissue collection and processing for metabolic analysis followed the same procedures as above.

#### 156 **Starch**

Ten mg of ball-milled leaf, bark or stem powder in 2 ml Eppendorf tubes were extracted five times using 1.5 ml ethanol:chloroform (1:1, v/v) with sonication. After two rinses with 80% ethanol,  $\alpha$ -amylase (1000 U, Sigma A4551) dissolved in 0.5 ml buffer (0.1 M sodium acetate, pH 5.0, with 5mM CaCl<sub>2</sub>) was added to the extracted residue. After a 30 min incubation at 85°C with 800 rpm shaking, samples were cooled and 10 ul of sodium acetate buffer (pH 5.0) containing 5 U amyloglucosidase (Sigma A1602) was added to the digest. Samples were digested at 50°C for 48 hr with shaking (800 rpm). Digests were then centrifuged at 24,000 g and an aliquot of the supernatant was removed for GC-MS detection of glucose as described above.

166

#### **Condensed tannins**

168 Condensed tannins (CT) were analyzed as in our previous work (Harding et al. 2005). Briefly, approximately 10 mg freeze-dried tissue powder was extracted in 600  $\mu$ l of methanol for 15 min in an ultrasonic bath and centrifuged at 15,000 g for 10 min. Pigment-containing supernatant was combined with water (400  $\mu$ l) and chloroform (400  $\mu$ l) in a new tube, then vortexed and centrifuged to remove pigments. The depigmented pellet and supernatant were combined and dried down for CT analysis by the butanol-HCl method (Porter et al. 1985).



174 Following incubation of the residues at 95°C for 20 min in 1 ml butanol-5% hydrochloric acid  
containing ferric ammonium sulfate, absorbance ( $A_{550}$ ) was read and quantified against aspen  
176 leaf CT standards.

### 178 **Phenolic glycosides**

Approximately 10 mg ball-milled, freeze-dried tissue leaf or bark tissue was used for each assay.  
180 Powders were sonicated twice for 15 min each at 4°C in 400  $\mu$ l of a master mix containing  
chloroform:methanol (1:1, v/v) and 700  $\mu$ M D<sub>5</sub>-benzoic acid internal standard. Water (200  $\mu$ l)  
182 was added to the sonicate which was vortexed and centrifuged to obtain a pigment-free upper  
phase for HPLC-TOF analysis. Samples were chromatographed using a Zorbax Eclipse XDB-C18  
184 High Resolution 4.6×50 mm column with 1.8 micron particle size. Mobile phases were (A) 97%  
H<sub>2</sub>O/3% acetonitrile/0.1% formic acid and (B) 97% acetonitrile/3% H<sub>2</sub>O/0.1% formic acid.  
186 Column temperature was 30°C. Elution followed the gradient: 3%B (0-1 min); 3%B-17%B (1-3  
min); 17%B (3-5 min); 17%B-60%B (5-9 min); 60%B-98%B (9-11 min). Detection was by MS-TOF  
188 (Agilent 6220) in negative mode using electro-spray ionization, capillary voltage 3500V, and  
fragmenter voltage set at 125V. Retention times and MS spectra were compared to those of  
190 salicortin (formic acid adduct  $m/z$  470.4) and tremulacin (formic acid adduct  $m/z$  573.5) isolated  
from bark tissue.

192

### **Water uptake**

194 Water uptake was determined gravimetrically by changes in pot weight over a 90-min uptake  
period shortly before plants were to be harvested. Water uptake was calculated on a leaf  
196 biomass basis. From previous work, specific leaf area (cm<sup>2</sup>/g dry weight) did not differ between  
lines (Frost et al. 2012).

198

### **Relative water content experiment**

200 Relative water content (RWC) was determined as (fresh weight-dry weight)/(hydrated weight-  
dry weight). Hydrated weight was obtained after allowing leaves to equilibrate in a dark  
202 chamber with petioles immersed in water for 4 hr. Additional equilibration did not measurably

increase hydrated weight. Primary internode sections were floated on water for the 4-hr  
204 hydration, then blotted dry, weighed and dried in a forced air oven at 60°C for 48 hr.

206

## Results

208

### **Defoliation affected leaf photosynthesis similarly in WT and RNAi plants**

210 Defoliation treatments were carried out to reduce source capacity relative to sink size. Post-  
defoliation carbohydrate, water uptake, and growth adjustments in WT and *SUT4*-RNAi lines  
212 were compared. At the time of treatment initiation, the stem was marked at the LPI-0 node  
corresponding to the first unfurled leaf reaching 2 cm in length (Larson and Isebrands 1971).  
214 Removal of every third leaf below the mark comprised the 25% defoliation treatment; and of  
every other leaf, the 50% defoliation treatment. The maximum photosynthesis rate of post-  
216 treatment emerged source leaf (LPI-6) did not change significantly eight days after 25%  
defoliation in any of the genotypes. Trends toward increased photosynthesis were observed in  
218 all plants by the 50% defoliation treatment, but the increases were statistically significant only  
in RNAi line G, nearly so in line F, and not in WT (Table 1). When data from all three lines were  
220 pooled together, photosynthesis increased significantly by ~15% ( $P = 0.001$ ) in the 50%  
defoliation treatment. Photosynthesis of LPI-6 did not change significantly following a 100%  
222 defoliation treatment in which all leaves below LPI-0 were removed, but trended lower than in  
undefoliated or partially defoliated plants (Table 1). Internal leaf CO<sub>2</sub> concentrations trended  
224 lower in all lines as photosynthesis increased following 50% defoliation (Table 1).

### **Defoliation affected transpiration water uptake and leaf water retention differently in WT and RNAi plants**

228 LPI-6 transpiration rates were significantly higher overall after 8 days in 50% defoliated than in  
non-defoliated controls in Experiment 1 (Table 1). In contrast to what we observed for  
230 photosynthesis, the transpiration increase was larger in WT than RNAi lines by roughly 2-fold  
(25% and 10-13%, respectively) (Table 1). The increase was significant for WT, but for only one

232 of the RNAi lines. Stomatal conductance did not differ between genotypes or defoliation  
treatments (Table 1). Transpiration was not measured in Experiment 2, but water uptake  
234 normalized to leaf mass was measured in that experiment and repeated in a separate cohort of  
plants that were defoliated and harvested two weeks after the first cohort. In both cases,  
236 water uptake was measured just before harvest at 16 days (Figure 1). Water uptake was similar  
in non-defoliated WT and RNAi plants in both trials, but the increase following 50% defoliation  
238 was approximately 2-fold greater in WT than in plants of either RNAi line (Figure 1).

240 Leaf water contents were measured only in Experiment 1. Defoliation led to increased water  
content in new leaves that emerged and expanded after defoliation (Figure 2A). The increases  
242 were significant at all defoliation levels for the RNAi lines, but only at 100% defoliation for WT.  
At 100% defoliation, the % water increases were the same in all lines. Source leaves that  
244 remained on the plant after partial defoliations of 25% and 50% exhibited water content  
decreases in WT but not RNAi lines (Figure 2B).

246

#### **Defoliation affected sucrose and hexose levels similarly in WT and RNAi plants**

248 Prior to defoliation, sucrose levels were higher in the RNAi lines as has been reported  
(Payyavula et al. 2011). The 8-day experiment tested three defoliation levels, 25%, 50% and  
250 100%, and the only sustained trend across all three defoliation levels was decreasing soluble  
sugars (hexose and sucrose) in wood (Figure 3). The decrease was apparent in both WT and  
252 RNAi plants. Similar patterns were observed after a 16-day 50% defoliation treatment  
(Experiment 2), with trends toward decreased soluble sugar levels in both wood and bark  
254 (Figure S1). The apparent magnitude of the decrease after 50% defoliation (Experiment 1 and  
Experiment 2) or 100% defoliation (Experiment 1 only) differed little between lines (Figure 3  
256 and Figure S1). The average sugar decreases after 8 and 16 days of partial (50%) defoliation are  
summarized in condensed form for all shoot organs to illustrate the broad finding that there  
258 was no clear depletion of leaf sugars by either treatment, but that depletions became more  
severe after 16 days for bark, and especially wood (Table 2).

260

Leaf, bark and wood starch were only measured in the 16-day study (Experiment 2). By day 16,  
262 starch decreased, most clearly in bark and wood of the 50% defoliated plants (Figure 4). As  
with sugars, the decreases were similar in WT and RNAi lines (Figure 4).

264

#### **Relative water content changed more rapidly in WT than RNAi tissues during solar warming**

266 The transpiration and leaf water content differences between WT and RNAi plants led us to  
conduct a stand-alone experiment to assess whether leaf relative water content (RWC) changed  
268 the same way in WT and RNAi tissues when plants underwent gradual warming due to  
increasing sunlight (Table 3). Water uptake was not measured but pots were watered to  
270 saturation at the start of the 4-hr measurement period. As expected, water content decreased  
significantly in all lines as temperature and light intensity increased (Table 3). RWC also  
272 decreased significantly in all lines, but the decrease in upper stem internodes of RNAi was half  
that observed in WT plants between 7 AM and 11 AM (Table 3). While upper stem RWC did not  
274 differ statistically between genotypes at 7 AM, upper stem RWC was significantly higher in RNAi  
than WT plants at 11 AM. During the same 4-hr period, the RWC average in mature source  
276 leaves also decreased more in WT than RNAi plants (Table 3).

#### **Secondary metabolism was not altered in RNAi compared to WT plants**

Non-structural phenylpropanoid end-products, including flavonoid-derived proanthocyanidins,  
280 or condensed tannins (CT), and phenolic glycoside salicinoids typically accumulate in leaves and  
bark of poplars and other species of the family Salicaceae (Harding et al. 2005; Harding et al.  
282 2014). They comprise important metabolic sinks because of their abundance, metabolic  
stability and impact on trophic interactions (Kleiner et al. 1999; Ruuhola and Julkunen-Tiitto  
284 2000; Kandil et al. 2004). Average CT abundance trended lower, but not significantly, in leaves  
and bark of partially defoliated than of non-defoliated plants, and there was no difference  
286 between genotypes (Table 4). Salicinoids, shown as the abundance of the major phenolic  
glycosides salicortin and tremulacin summed, exhibited no significant differences in leaves or  
288 bark in response to partial defoliation, though there were modest small decreases in bark. In all  
cases, the magnitudes of the CT and salicinoid trends were similar in WT and RNAi lines.

290

### Shoot growth was more negatively affected by partial defoliation in RNAi than WT

292 Stem biomass was divided by leaf biomass to obtain an index of leaf ability to sustain stem  
biomass production, or 'growth' in Experiment 2. Stem mass per unit leaf mass did not differ  
294 between WT and RNAi lines when intact plants were compared, but was greater for WT than  
either RNAi line when defoliated plants were compared (Figure 5).

296

### 298 Discussion

300 The knowledge gap we sought to address centers around the physiological role of PtaSUT4, a  
highly conserved tonoplast sucrose transporter with orthologs in monocots, dicots and basal  
302 angiosperm taxa (Peng et al. 2014). While SUT4 mediates sucrose efflux from the vacuole into  
the cytosol, the physiological relevance of that efflux in tree species such as *Populus* is being  
304 revealed only gradually (Payyavula et al. 2011; Frost et al. 2012; Xue et al. 2016). Those studies  
explored the effects of SUT4-RNAi on overall plant growth, sugar level and gene expression  
306 under varied conditions of water or nitrogen deficit. The defoliation treatments in this study  
were expected to increase transpiration and thus water flux through the remaining leaves as  
308 has been reported elsewhere for *Populus* (Liu et al. 2014), thereby testing SUT4 function in a  
novel context with new physiological implications. In short, leaf water flux increased, but less  
310 robustly in RNAi than WT plants (Table 1 and Figure 1). Hydraulic conductivity through roots  
can also be decreased by partial defoliation in *Populus* (Liu et al. 2014). Although root  
312 conductivity was not measured in our study, the greater increases we observed in RNAi leaf  
water content following defoliation (Figure 2) are not consistent with the idea of a more  
314 limiting root hydraulic conductivity in the RNAi lines. In contrast to the differentials in water  
uptake, sink carbohydrate levels decreased similarly after defoliation in all genotypes (Table 2,  
316 Figures 3-4, and Figure S1). Photosynthesis was only measured in Experiment 1, and it  
increased at least as strongly in RNAi as in WT plants after partial defoliation (Table 1). In light  
318 of the differences in water uptake, we concluded that the greater growth reductions in RNAi

than WT plants after defoliation (Figure 5) were due more to water uptake than to  
320 carbohydrate availability.

322 Because leaf water content increased more in RNAi plants, and stomatal conductance did not  
vary between lines or defoliation levels, we suggest that less robust compensatory uptake of  
324 water by the RNAi plants (Table 1 and Figure 1) reflected a weaker capacity to increase leaf  
hydraulic conductivity, the ability of water to move through the leaf toward the stomata. In a  
326 previous study, we reported that plant water uptake was slower in RNAi plants even in the  
absence of a defoliation treatment (Frost et al. 2012). However, the water uptake differences  
328 in that study were observed in a context of soil drying. The findings from both studies are  
consistent with a slowed or limited ability of RNAi leaves to make hydraulic conductivity  
330 adjustments.

332 Partial defoliation and silvicultural treatments such as thinning have long been known to result  
in increased photosynthesis, transpiration and productivity on a leaf area or plant basis (von  
334 Caemmerer and Farquhar 1984; Breda et al. 1995). Increased transpiration under non-stress  
conditions is supported by increased hydraulic conductivity which minimizes the lowering of  
336 leaf water potentials in a way that might be detrimental to photosynthesis (Brodrribb and  
Holbrook 2006; Blackman et al. 2009; Liu et al. 2014; Simonin et al. 2015). Decreased leaf  
338 water potential has been reported in the case of well-watered, partially defoliated *Eucalyptus*  
when hydraulic conductivity did not increase (Eyles et al. 2013). A number of studies suggest  
340 that dynamic adjustments in hydraulic conductivity depend on the expression of aquaporins  
(Cochard et al. 2007; Pou et al. 2013; Liu et al. 2014). Aquaporins form pores in membranes  
342 that allow water to move intracellularly or across membranes and through tissues toward  
locations of lower water potential (Kapilan et al. 2018). The degree to which such adjustments  
344 can alter hydraulic conductivity will also depend on anatomical traits that differ between  
species and dictate the mass movement of water within tissues, or a plant's vulnerability to  
346 embolism and hydraulic failure (Zwieniecki et al. 2007; Blackman et al. 2009).

348 In our study, leaves that emerged and expanded before (Figure 2A) as opposed to after (Figure  
2B) defoliation certainly differed with respect to their water retention responses. However,  
350 there was a tendency toward higher water retention by *SUT4*-RNAi leaves than WT leaves,  
regardless of their developmental stage (Figure 2A versus 2B) at the time of defoliation. This  
352 points toward a dependence of at least part of the RNAi effect on a subcellular dynamic that did  
not necessarily depend on developmental changes in vascular and leaf surface characteristics.  
354 In fact, decreases in RWC developed more rapidly in WT than RNAi tissues in response to  
gradual warming and increasing light intensity during a 4-hr period (Table 3). RWC correlated  
356 similarly with leaf water potential measured by a pressure bomb for both WT and RNAi leaves  
(Figure S2). At this point therefore, we interpret the findings to be consistent with the idea that  
358 reduced inter-compartmental sucrose trafficking has consequences for the dynamic control of  
osmotic gradients within the cell. Although we can only offer this as a suggestion, it is possible  
360 that the export of vacuolar sucrose into the cytosol is coupled with increased cytosolic  
invertase activity. This in turn would be expected to affect osmotic gradients and the  
362 expression or activity of aquaporins that condition hydraulic conductivity and ultimately  
transpiration (Chaumont and Tyerman 2014; Maurel et al. 2015).

364

Following this line of reasoning, we speculate that sucrose export from the vacuole to the  
366 cytosol in parenchyma or mesophyll cells that are adjacent to minor vein xylem vessels in the  
leaf could promote withdrawal of water from the vessels into the extraxylary symplasm.  
368 Aquaporins could then facilitate the cross-membrane dispersal of water via extraxylary  
apoplastic and symplastic spaces throughout the leaf, leading to enhanced transpiration. The  
370 idea that specifically localized tonoplast aquaporins can contribute to leaf hydraulic  
conductivity in this fashion has been proposed (Laur and Hacke 2014). Other studies report  
372 that additional aquaporins are likely involved with the regulation of leaf hydraulic conductivity  
and the extraxylary movement of water (Pou et al. 2013). We have reported previously that  
374 RNAi-silencing of *PtaSUT4* indeed influences the expression of several aquaporins during a  
drought response (Xue et al. 2016). Under circumstances of reduced *SUT4* expression such as  
376 in RNAi plants or water-limited WT plants (Frost et al. 2012), defoliation-induced changes in

378 aquaporin expression or activity could result in the vacuolar entrapment of water arriving from  
the apoplasm. The present work affirms that source reduction due to partial defoliation  
stimulates transpiration, but that SUT4-mediated subcellular sucrose distribution could affect  
380 the partitioning of water during its transit through the leaf.

382 Stronger water retention in both newly expanded and older source leaves of RNAi plants  
following defoliation is consistent with increased vacuolar sequestration of water entering the  
384 leaf symplasm during the transpiration increase. Greater sequestration would have the effect  
of competing with transpiration in the RNAi plants. We note that the magnitude of such  
386 competition could vary with the expression level of *PtaSUT4* in WT plants. For example, partial  
defoliation of drought-adapted poplar plants where *PtaSUT4* expression is low (Frost et al.  
388 2012) might result in a smaller compensatory transpiration increase than in moisture replete  
plants. How SUT4 and aquaporins coordinate at a micro-anatomical level to condition leaf  
390 hydraulic properties in the ways suggested here is clearly beyond the scope of this work and  
remains to be investigated.

392

## References

- Ayre BG (2011) Membrane-Transport Systems for Sucrose in Relation to Whole-Plant Carbon Partitioning. *Mol Plant*. 4:377-394.
- Blackman CJ, Brodribb TJ, Jordan GJ (2009) Leaf hydraulics and drought stress: response, recovery and survivorship in four woody temperate plant species. *Plant Cell Environ*. 32:1584-1595.
- Breda N, Granier A, Aussenac G (1995) Effects of thinning on soil and tree water relations, transpiration and growth in an Oak forest (*Quercus-petraea* (Matt) Liebl.). *Tree Physiol*. 15:295-306.
- Brodribb TJ, Holbrook NM (2006) Declining hydraulic efficiency as transpiring leaves desiccate: two types of response. *Plant Cell Environ*. 29:2205-2215.
- Chaumont F, Tyerman SD (2014) Aquaporins: Highly Regulated Channels Controlling Plant Water Relations. *Plant Physiol*. 164:1600-1618.
- Cochard H, Venisse JS, Barigah TS, Brunel N, Herbette S, Guilliot A, Tyree MT, Sakr S (2007) Putative role of aquaporins in variable hydraulic conductance of leaves in response to light. *Plant Physiol*. 143:122-133.
- Davidson A, Keller F, Turgeon R (2011) Phloem loading, plant growth form, and climate. *Protoplasma*. 248:153-163.



- Durand M, Porcheron B, Hennion N, Maurousset L, Lemoine R, Pourtau N (2016) Water Deficit Enhances C Export to the Roots in *Arabidopsis thaliana* Plants with Contribution of Sucrose Transporters in Both Shoot and Roots. *Plant Physiol.* 170:1460-1479.
- Eom JS, Cho JI, Reinders A, Lee SW, Yoo Y, Tuan PQ, Choi SB, Bang G, Park YI, Cho MH, Bhoo SH, An G, Hahn TR, Ward JM, Jeon JS (2011) Impaired function of the tonoplast-localized sucrose transporter in rice, *OsSUT2*, limits the transport of vacuolar reserve sucrose and affects plant growth. *Plant Physiol.* 157:109-119.
- Eom JS, Choi SB, Ward JM, Jeon JS (2012) The mechanism of phloem loading in rice (*Oryza sativa*). *Mol Cells.* 33:431-438.
- Eyles A, Pinkard EA, Davies NW, Corkrey R, Churchill K, O'Grady AP, Sands P, Mohammed C (2013) Whole-plant versus leaf-level regulation of photosynthetic responses after partial defoliation in *Eucalyptus globulus* saplings. *J Exp Bot.* 64:1625-1636.
- Frost CJ, Nyamdari B, Tsai CJ, Harding SA (2012) The Tonoplast-Localized Sucrose Transporter in *Populus* (*PtaSUT4*) Regulates Whole-Plant Water Relations, Responses to Water Stress, and Photosynthesis. *PLoS One.* 7:10.
- Fu QS, Cheng LL, Guo YD, Turgeon R (2011) Phloem Loading Strategies and Water Relations in Trees and Herbaceous Plants. *Plant Physiol.* 157:1518-1527.
- Gong X, Liu ML, Zhang LJ, Ruan YY, Ding R, Ji YQ, Zhang N, Zhang SB, Farmer J, Wang C (2015) *Arabidopsis AtSUC2* and *AtSUC4*, encoding sucrose transporters, are required for abiotic stress tolerance in an ABA-dependent pathway. *Physiol Plant.* 153:119-136.
- Harding SA, Jiang HY, Jeong ML, Casado FL, Lin HW, Tsai CJ (2005) Functional genomics analysis of foliar condensed tannin and phenolic glycoside regulation in natural cottonwood hybrids. *Tree Physiol.* 25:1475-1486.
- Harding SA, Xue LJ, Du L, Nyamdari B, Lindroth RL, Sykes R, Davis MF, Tsai CJ (2014) Condensed tannin biosynthesis and polymerization synergistically condition carbon use, defense, sink strength and growth in *Populus*. *Tree Physiol.* 34:1240-1251.
- Jeong ML, Jiang HY, Chen HS, Tsai CJ, Harding SA (2004) Metabolic profiling of the sink-to-source transition in developing leaves of quaking aspen. *Plant Physiol.* 136:3364-3375.
- Kandil FE, Grace MH, Seigler DS, Cheeseman JM (2004) Polyphenolics in *Rhizophora mangle* L. leaves and their changes during leaf development and senescence. *Trees-Struct Funct.* 18:518-528.
- Kapilan R, Vaziri M, Zwiazek JJ (2018) Regulation of aquaporins in plants under stress. *Biol Res.* 51:11.
- Kleiner KW, Raffa KF, Dickson RE (1999) Partitioning of C-14-labeled photosynthate to allelochemicals and primary metabolites in source and sink leaves of aspen: evidence for secondary metabolite turnover. *Oecologia.* 119:408-418.
- Larson PR, Isebrands JG (1971) The Plastochron Index as Applied to Developmental Studies of Cottonwood. *Canadian Journal of Forest Research.* 1:1-11.
- Laur J, Hacke UG (2014) The Role of Water Channel Proteins in Facilitating Recovery of Leaf Hydraulic Conductance from Water Stress in *Populus trichocarpa*. *PLoS One.* 9:10.
- Liesche J (2017) Sucrose transporters and plasmodesmal regulation in passive phloem loading. *J Integr Plant Biol.* 59:311-321.

- Liu J, Equiza MA, Navarro-Rodenas A, Lee SH, Zwiazek JJ (2014) Hydraulic adjustments in aspen (*Populus tremuloides*) seedlings following defoliation involve root and leaf aquaporins. *Planta*. 240:553-564.
- Lloyd JC, Zakhleniuk OV (2004) Responses of primary and secondary metabolism to sugar accumulation revealed by microarray expression analysis of the Arabidopsis mutant, *pho3*. *J Exp Bot*. 55:1221-1230.
- Maurel C, Boursiac Y, Luu DT, Santoni V, Shahzad Z, Verdoucq L (2015) Aquaporins in plants. *Physiol Rev*. 95:1321-1358.
- Milne RJ, Byrt CS, Patrick JW, Grof CPL (2013) Are sucrose transporter expression profiles linked with patterns of biomass partitioning in Sorghum phenotypes? *Front Plant Sci*. 4:12.
- Pagliarani C, Casolo V, Beiragi MA, Cavalletto S, Siciliano I, Schubert A, Gullino ML, Zwieniecki MA, Secchi F (2019) Priming xylem for stress recovery depends on coordinated activity of sugar metabolic pathways and changes in xylem sap pH. *Plant Cell Environ*. 42:1775-1787.
- Payyavula RS, Tay KHC, Tsai CJ, Harding SA (2011) The sucrose transporter family in Populus: the importance of a tonoplast PtaSUT4 to biomass and carbon partitioning. *Plant J*. 65:757-770.
- Peng D, Gu X, Xue LJ, Leebens-Mack JH, Tsai CJ (2014) Bayesian phylogeny of sucrose transporters: ancient origins, differential expansion and convergent evolution in monocots and dicots. *Front Plant Sci*. 5:12.
- Porter LJ, Hrstich LN, Chan BG (1985) The conversion of procyanidins and prodelphinidins to cyanidin and delphinidin. *Phytochemistry*. 25:223-230.
- Pou A, Medrano H, Flexas J, Tyerman SD (2013) A putative role for TIP and PIP aquaporins in dynamics of leaf hydraulic and stomatal conductances in grapevine under water stress and re-watering. *Plant Cell Environ*. 36:828-843.
- Reinders A, Sivitz AB, Starker CG, Gantt JS, Ward JM (2008) Functional analysis of LjSUT4, a vacuolar sucrose transporter from *Lotus japonicus*. *Plant Mol Biol*. 68:289-299.
- Rennie EA, Turgeon R (2009) A comprehensive picture of phloem loading strategies. *Proc Natl Acad Sci U S A*. 106:14162-14167.
- Ruuhola TM, Julkunen-Tiitto MRK (2000) Salicylates of intact *Salix myrsinifolia* plantlets do not undergo rapid metabolic turnover. *Plant Physiol*. 122:895-905.
- Schneider S, Hulpke S, Schulz A, Yaron I, Holl J, Imlau A, Schmitt B, Batz S, Wolf S, Hedrich R, Sauer N (2012) Vacuoles release sucrose via tonoplast-localised SUC4-type transporters. *Plant Biol*. 14:325-336.
- Schulz A, Beyhl D, Marten I, Wormit A, Neuhaus E, Poschet G, Buttner M, Schneider S, Sauer N, Hedrich R (2011) Proton-driven sucrose symport and antiport are provided by the vacuolar transporters SUC4 and TMT1/2. *Plant J*. 68:129-136.
- Simonin KA, Burns E, Choat B, Barbour MM, Dawson TE, Franks PJ (2015) Increasing leaf hydraulic conductance with transpiration rate minimizes the water potential drawdown from stem to leaf. *J Exp Bot*. 66:1303-1315.
- Slewinski TL, Zhang CK, Turgeon R (2013) Structural and functional heterogeneity in phloem loading and transport. *Front Plant Sci*. 4:11.
- Tschaplinski TJ, Tuskan GA, Sewell MM, Gebre GM, Donald ETI, Pendley C (2006) Phenotypic variation and quantitative trait locus identification for osmotic potential in an

- interspecific hybrid inbred F-2 poplar pedigree grown in contrasting environments. *Tree Physiol.* 26:595-604.
- Turgeon R, Medville R (1998) The absence of phloem loading in willow leaves. *Proc Natl Acad Sci U S A.* 95:12055-12060.
- Turnbull TL, Adams MA, Warren CR (2007) Increased photosynthesis following partial defoliation of field-grown *Eucalyptus globulus* seedlings is not caused by increased leaf nitrogen. *Tree Physiol.* 27:1481-1492.
- von Caemmerer S, Farquhar GD (1984) Effects of partial defoliation, changes of irradiance during growth, short-term water stress and growth at enhanced p(CO<sub>2</sub>) on the photosynthetic capacity of leaves of *Phaseolus vulgaris* L. *Planta.* 160:320-329.
- Wiley E, Huepenbecker S, Casper BB, Helliker BR (2013) The effects of defoliation on carbon allocation: can carbon limitation reduce growth in favour of storage? *Tree Physiol.* 33:1216-1228.
- Xue LJ, Frost CJ, Tsai CJ, Harding SA (2016) Drought response transcriptomes are altered in poplar with reduced tonoplast sucrose transporter expression. *Sci Rep.* 6:14.
- Zhang CK, Han L, Slewinski TL, Sun JL, Zhang J, Wang ZY, Turgeon R (2014) Symplastic Phloem Loading in Poplar. *Plant Physiol.* 166:306-U443.
- Zwieniecki MA, Brodribb TJ, Holbrook NM (2007) Hydraulic design of leaves: insights from rehydration kinetics. *Plant Cell Environ.* 30:910-921.

**Table 1.** Leaf gas exchange after 8 days at various defoliation levels

| Defoliation level                                                     | WT            | line G         | line F        | overall          |
|-----------------------------------------------------------------------|---------------|----------------|---------------|------------------|
| <b>Maximum photosynthesis (mmol CO<sub>2</sub>/m<sup>2</sup>/sec)</b> |               |                |               |                  |
| 0%                                                                    | 14.91 ± 0.67  | 12.39 ± 1.50*  | 13.53 ± 1.68  | 13.49 ± 1.64     |
| 25%                                                                   | 14.44 ± 1.16  | 13.51 ± 0.58   | 14.21 ± 1.25  | 14.05 ± 1.03     |
| 50%                                                                   | 16.16 ± 1.51  | 15.12 ± 0.34   | 15.38 ± 0.23  | 15.55 ± 0.94     |
| 100%                                                                  | 11.23 ± 0.59  | 12.46 ± 1.25   | 12.53 ± 0.10  | 12.07 ± 1.13     |
| <i>P</i> (0% vs. 50%)                                                 | 0.248         | <b>0.012</b>   | 0.071         | <b>0.001</b>     |
| % increase                                                            | 8.3%          | 22.0%          | 13.7%         | 15.3%            |
| <b>Transpiration rate (mmol H<sub>2</sub>O/m<sup>2</sup>/sec)</b>     |               |                |               |                  |
| 0%                                                                    | 8.78 ± 0.60   | 9.18 ± 0.72    | 8.60 ± 0.87   | 8.86 ± 0.72      |
| 25%                                                                   | 9.65 ± 0.57   | 9.55 ± 1.20    | 9.44 ± 0.71   | 9.55 ± 0.79      |
| 50%                                                                   | 10.96 ± 0.77  | 10.33 ± 0.21   | 9.47 ± 0.37*  | 10.25 ± 0.82     |
| 100%                                                                  | 9.51 ± 0.58   | 9.40 ± 0.54    | 9.82 ± 0.27   | 9.61 ± 0.57      |
| <i>P</i> (0% vs. 50%)                                                 | <b>0.010</b>  | <b>0.047</b>   | 0.115         | <b>&lt;0.001</b> |
| % increase                                                            | 24.8%         | 12.5%          | 10.1%         | 15.7%            |
| <b>Stomatal conductance rate (mmol/m<sup>2</sup>/sec)</b>             |               |                |               |                  |
| 0%                                                                    | 0.80 ± 0.06   | 0.84 ± 0.10    | 0.71 ± 0.03   | 0.76 ± 0.13      |
| 25%                                                                   | 0.87 ± 0.04   | 0.91 ± 0.08    | 0.81 ± 0.10   | 0.86 ± 0.08      |
| 50%                                                                   | 0.78 ± 0.08   | 0.90 ± 0.08    | 0.76 ± 0.06   | 0.80 ± 0.09      |
| 100%                                                                  | 0.86 ± 0.13   | 0.89 ± 0.06    | 0.90 ± 0.10   | 0.88 ± 0.09      |
| <i>P</i> (0% vs. 50%)                                                 | 0.665         | 0.392          | 0.246         | 0.665            |
| % increase                                                            | -3.0%         | 7.8%           | 7.2%          | 6.5%             |
| <b>Internal CO<sub>2</sub> (ppm)</b>                                  |               |                |               |                  |
| 0%                                                                    | 321.80 ± 2.69 | 330.25 ± 5.40* | 323.00 ± 9.99 | 325.54 ± 7.09    |
| 25%                                                                   | 323.65 ± 6.51 | 328.80 ± 6.13  | 322.40 ± 7.04 | 324.95 ± 6.61    |
| 50%                                                                   | 311.10 ± 8.79 | 321.20 ± 0.72  | 315.60 ± 4.43 | 315.49 ± 6.83    |
| 100%                                                                  | 334.60 ± 5.40 | 332.60 ± 2.79  | 331.05 ± 3.52 | 332.75 ± 3.97    |
| <i>P</i> (0% vs. 50%)                                                 | 0.102         | <b>0.037</b>   | 0.236         | <b>0.004</b>     |
| % increase                                                            | 3.3%          | 2.7%           | 2.3%          | 3.1%             |

Values represent the mean ± SD of n=4 plants for each genotype, and n=12 for overall. Statistical significance was determined by Student's *t* test between WT and RNAi plants (\*, *P* < 0.05) or between 0% and 50% treatments as indicated by *P* values.

**Table 2.** Overall changes in sucrose and hexose concentration in three shoot organs due to 8-day or 16-day defoliation treatments

|                          |      | 0%         | 50%        | Fold change | <i>P</i>         |
|--------------------------|------|------------|------------|-------------|------------------|
| <i>8-day experiment</i>  |      |            |            |             |                  |
| sucrose                  | leaf | 13.4 ± 3.3 | 15.3 ± 3.8 | 1.15        | 0.190            |
|                          | bark | 10.2 ± 1.7 | 9.1 ± 1.3  | 0.90        | 0.120            |
|                          | wood | 2.7 ± 0.7  | 1.6 ± 0.6  | 0.59        | <b>&lt;0.001</b> |
| hexose                   | leaf | 2.9 ± 0.8  | 3.4 ± 0.9  | 1.17        | 0.221            |
|                          | bark | 2.9 ± 0.6  | 2.8 ± 1.0  | 0.99        | 0.924            |
|                          | wood | 5.0 ± 1.7  | 2.8 ± 1.0  | 0.57        | <b>0.002</b>     |
| <i>16-day experiment</i> |      |            |            |             |                  |
| sucrose                  | leaf | 13.7 ± 4.8 | 13.3 ± 4.4 | 0.97        | 0.857            |
|                          | bark | 8.4 ± 1.6  | 6.3 ± 1.1  | 0.75        | <b>0.007</b>     |
|                          | wood | 3.7 ± 2.2  | 1.2 ± 0.5  | 0.33        | <b>0.004</b>     |
| hexose                   | leaf | 1.6 ± 0.4  | 1.5 ± 0.3  | 0.95        | 0.686            |
|                          | bark | 3.0 ± 0.7  | 1.8 ± 0.5  | 0.60        | <b>&lt;0.001</b> |
|                          | wood | 7.8 ± 1.4  | 2.8 ± 0.7  | 0.37        | <b>&lt;0.001</b> |

Values represent the mean and standard deviation of n=12 plants for each defoliation level. *P* values for defoliation effects were determined using Student's *t* test. See Figure 3 and Figure S1 for Individual line data.

**Table 3.** Water content and relative water content changes in leaves and stem internodes during solar warming.

|                | Water content (%) |       |      |              | Relative water content (%) |        |      |                  |
|----------------|-------------------|-------|------|--------------|----------------------------|--------|------|------------------|
|                | 7 AM              | 11 AM | loss | <i>P</i>     | 7 AM                       | 11 AM  | loss | <i>P</i>         |
| Internodes 5-6 |                   |       |      |              |                            |        |      |                  |
| WT             | 79.00             | 76.30 | 2.70 | <b>0.025</b> | 95.58                      | 89.34  | 6.24 | <b>0.003</b>     |
| RNAi           | 80.80             | 78.70 | 2.10 | <b>0.008</b> | 96.47                      | 93.29* | 3.18 | <b>0.007</b>     |
| LPI-15         |                   |       |      |              |                            |        |      |                  |
| WT             | 72.20             | 70.30 | 1.90 | <b>0.037</b> | 98.68                      | 93.40  | 5.28 | <b>0.001</b>     |
| RNAi           | 69.80             | 68.50 | 1.30 | <b>0.022</b> | 99.29                      | 94.68  | 4.61 | <b>&lt;0.001</b> |

Water content was determined as (fresh weight – dry weight)/fresh weight, and relative water content was (fresh weight - dry weight)/(hydrated weight-dry weight). Values represent the mean of n=5 plants. Statistical significance was determined using Student's *t* test between WT and RNAi plants (\*, *P* < 0.05) or between measurement times (indicated by *P* values).

**Table 4.** Levels of salicinoids and condensed tannins in response to defoliation treatments

|             | Salicinoids  |              |              | Condensed tannins |              |             |
|-------------|--------------|--------------|--------------|-------------------|--------------|-------------|
|             | WT           | Line G       | Line F       | WT                | Line G       | Line F      |
| <i>Leaf</i> |              |              |              |                   |              |             |
| 0%          | 8.00 ± 0.88  | 7.40 ± 0.39  | 7.83 ± 0.70  | 6.22 ± 3.28       | 6.54 ± 1.25  | 6.77 ± 0.80 |
| 50%         | 8.74 ± 1.22  | 7.74 ± 1.02  | 7.68 ± 0.95  | 3.44 ± 1.40       | 4.64 ± 1.81  | 5.49 ± 2.53 |
| <i>P</i>    | 0.44         | 0.61         | 0.84         | 0.25              | 0.21         | 0.45        |
| <i>Bark</i> |              |              |              |                   |              |             |
| 0%          | 10.53 ± 0.75 | 10.97 ± 0.46 | 10.46 ± 0.57 | 2.80 ± 0.23       | 2.04 ± 0.25* | 3.22 ± 0.75 |
| 50%         | 9.07 ± 0.60  | 9.25 ± 1.42  | 9.18 ± 1.33  | 2.33 ± 0.58       | 2.01 ± 0.50  | 2.18 ± 0.39 |
| <i>P</i>    | 0.06         | 0.12         | 0.3          | 0.26              | 0.95         | 0.1         |

Values represent the mean±SD of n=3 plants. Statistical significance was determined by Student's *t* test between WT and RNAi plants (\*, *P* < 0.05) or between 0% and 50% treatments shown by *P* values. Salicinoids represent the sum of salicortin and tremulacin levels.

## Figure legends

**Figure 1.** Partial defoliation increased plant water uptake on a leaf mass basis.

Water uptake was measured gravimetrically over a 90-min period at mid-day (A), and for a separate cohort of plants over a 150-min period at mid-day (B). Data represent the mean and standard error of  $n=5$  WT or  $n=3$  RNAi plants. Asterisks over bars indicate significant defoliation effects as determined by Student's *t* test, and asterisks inside the bar indicate significant differences between WT and RNAi lines at 50% defoliation (\*\* $P < 0.001$ , \*  $P < 0.05$ ).

**Figure 2.** Leaf water contents responded differentially to partial defoliation in WT and RNAi plants.

(A) New leaves that expanded during the defoliation treatment. (B) Source leaves that were fully expanded at the start of the defoliation treatment. The data points are connected by lines to depict the trend in water content change as defoliation levels increased for each plant line. Data represent the mean and standard error of  $n=4$  plants. Asterisks are color coded by plant line and indicate significant defoliation effects versus non-defoliated (0%) controls as determined by Student's *t* test (\*\* $P < 0.001$ , \*\*  $P < 0.01$ , \*  $P < 0.05$ ).

**Figure 3.** Sucrose and hexose concentration trends in leaves, bark and wood of WT and RNAi plants in Experiment 1.

Data represent the mean and standard error of  $n=4$  plants. Asterisks are color-coded by line to indicate significant defoliation effects versus non-defoliated (0%) controls as determined by Student's *t* test (\*\*  $P < 0.01$ , \*  $P < 0.05$ ).

**Figure 4.** Defoliation-induced starch loss in shoot organs.

Data represents the mean and standard error of  $n=3$  plants. Asterisks indicate significant defoliation effects as determined by Student's *t* test (\*\* $P < 0.001$ , \*\*  $P < 0.01$ , \*  $P < 0.05$ ).

**Figure 5.** Stem growth per unit leaf mass was higher in wild type than RNAi plants following a 16-day 50% defoliation treatment in Experiment 2.

Data represent the mean and standard error of  $n=5$  WT or  $n=3$  RNAi plants. Asterisks indicate significant growth differences between partially defoliated WT and RNAi plants as determined by Student's *t* test (\*\*  $P < 0.01$ ).



## Supplemental Data

**Supplemental Figure S1.** Sucrose and hexose concentration trends in leaves, bark and wood of WT and RNAi plants in Experiment 2. Data represent the mean and standard error of n=3 plants. Asterisks indicate significant defoliation effects as determined by Student's *t* test (\*\*\*  $P < 0.001$ , \*\*  $P < 0.01$ , \*  $P < 0.05$ ).

**Supplemental Figure S2.** Relative water content correlated with leaf water potential as determined using a pressure bomb device. The correlation was very similar for WT and RNAi plants.

## Acknowledgements

The authors thank Stephen Pettis and Suzzanne Tate for greenhouse plant care, and Batbayar Nyamdari for GC-MS and LC-MS analysis. This research was supported by the Office of Biological and Environmental Research within the Department of Energy (grant no. DE-SC0005140) to SAH and CJT.

## Author Contributions

SAH and CJT conceived the study, CJF and SAH designed and performed the research, SAH analyzed the data and wrote the paper with contributions from CJF and CJT.

## Conflict of Interest Statement

The authors declare no conflict of interest.

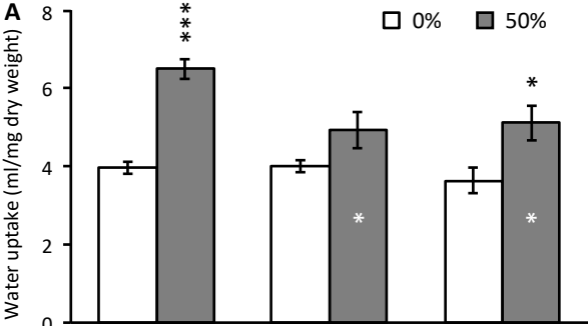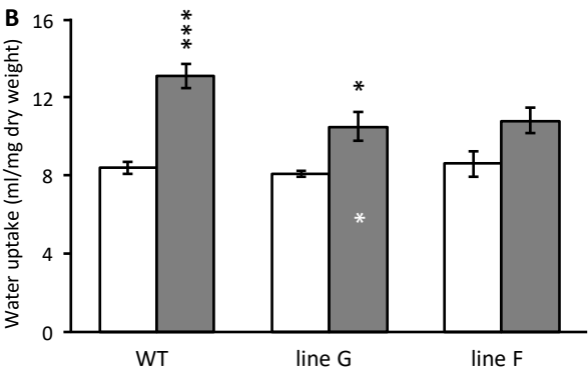

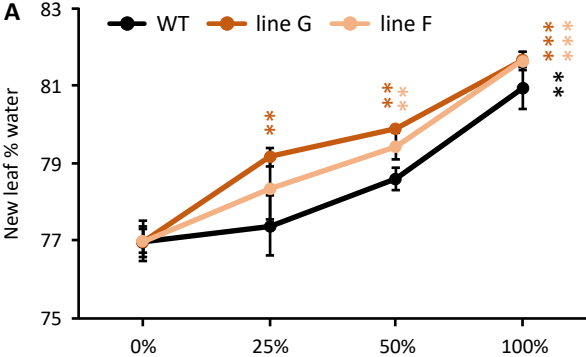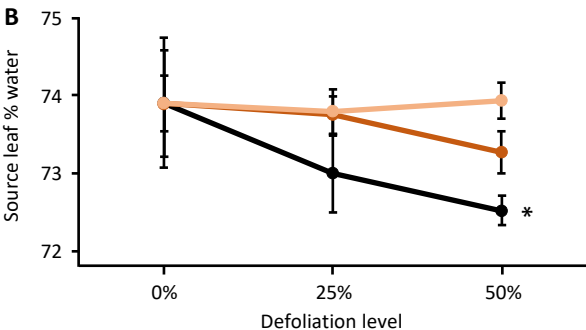

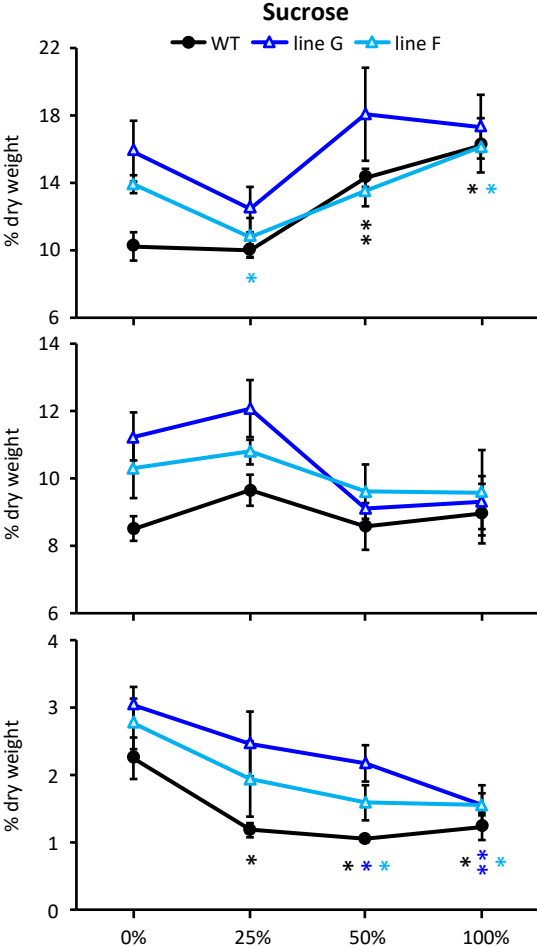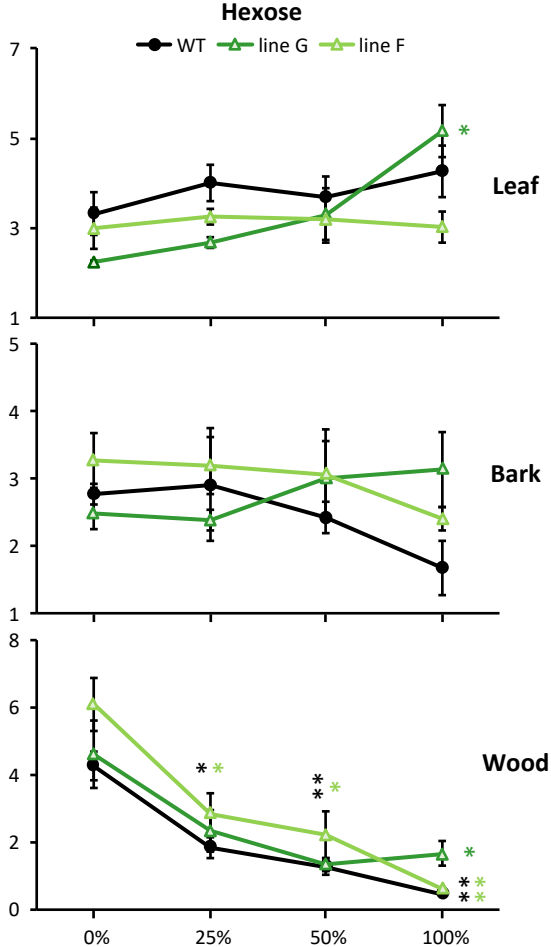

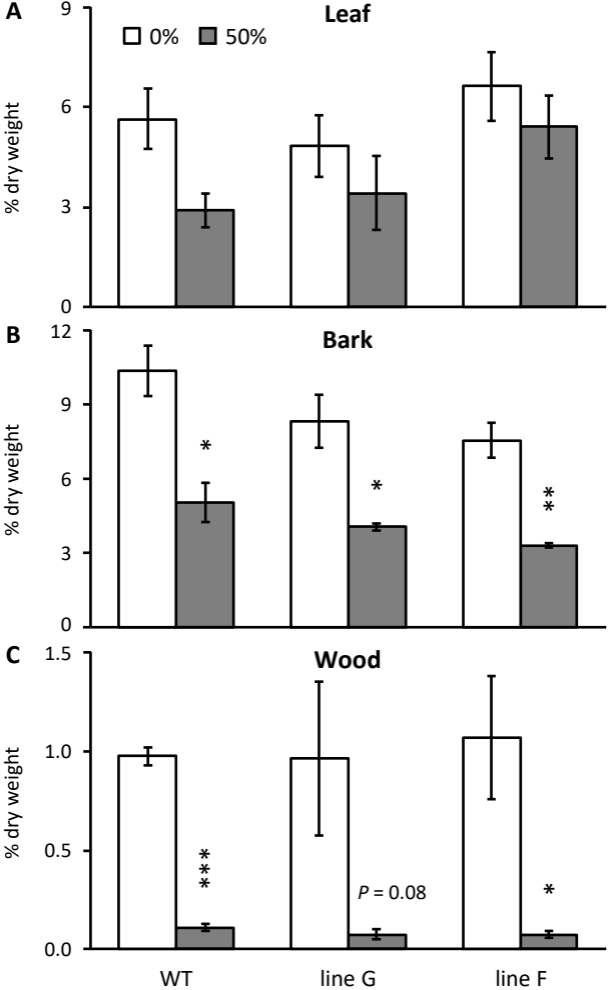

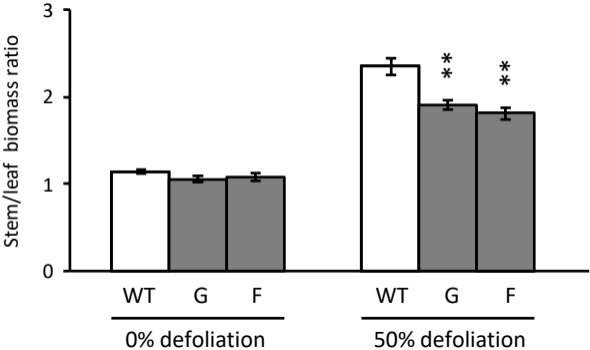

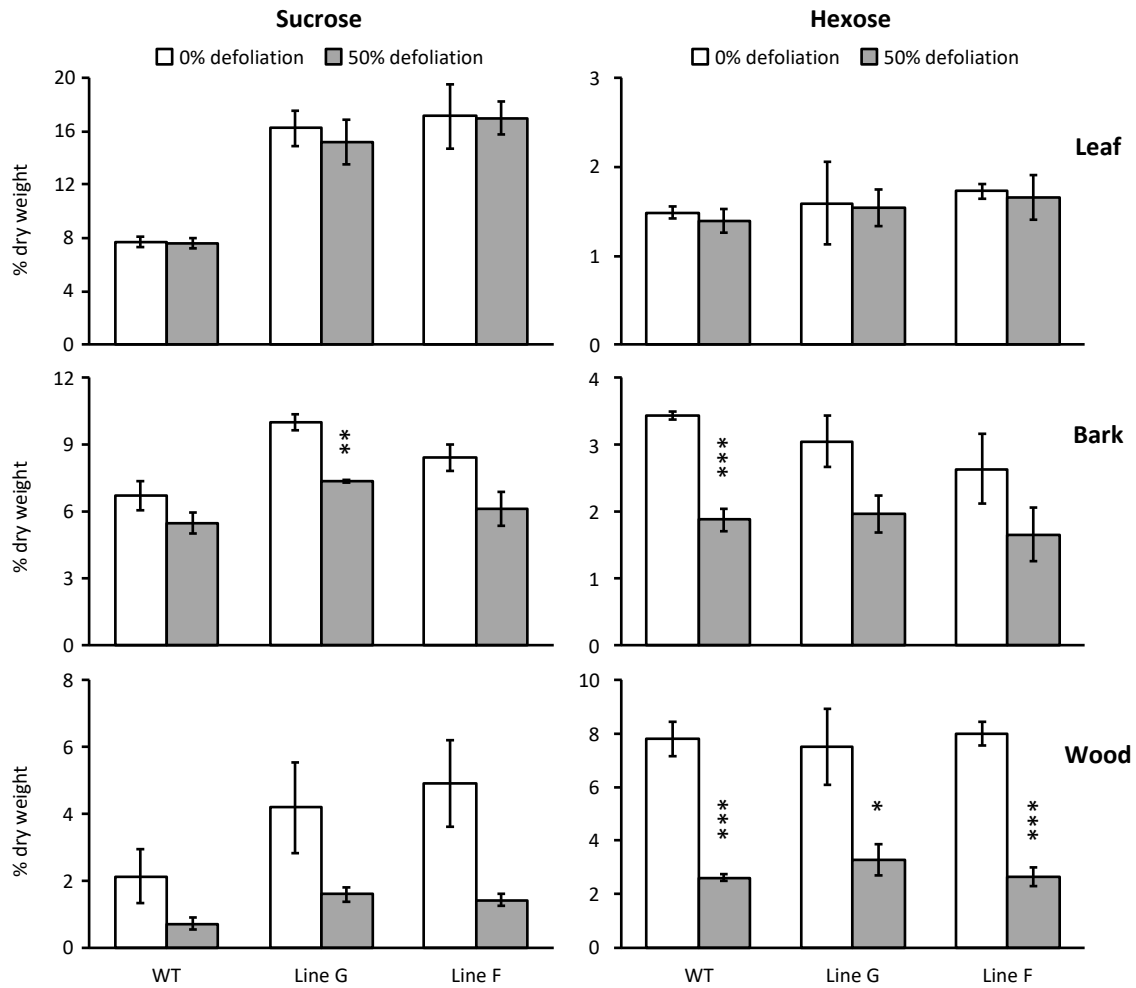

**Supplemental Figure S1.** Sucrose and hexose concentration trends in leaves, bark and wood of WT and RNAi plants in Experiment 2.

Data represent the mean and standard error of  $n=3$  plants. Asterisks indicate significant defoliation effects as determined by Student's  $t$  test (\*\* $P < 0.001$ , \*\* $P < 0.01$ , \* $P < 0.05$ ).

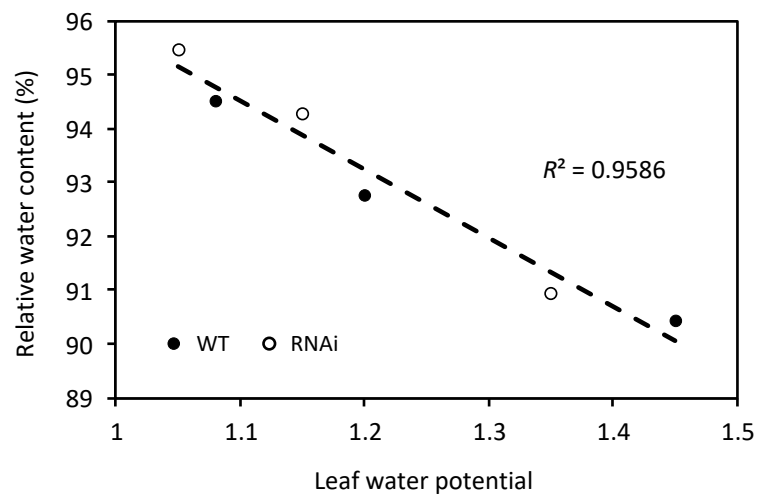

**Supplemental Figure S2.** Relative water content correlated with leaf water potential as determined using a pressure bomb device. The correlation was very similar for WT and RNAi plants.
